# Supplementary material
Source: PubMed Central journal article supplement (PMC4599133)
Supplement: Supp_Figure1.pdf [file Supp_Figure1.pdf]

## Supplementary Data

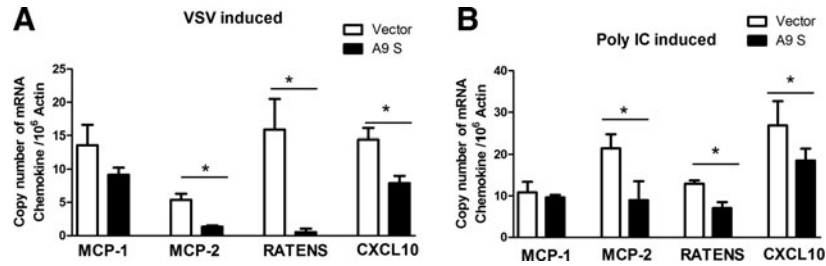

**SUPPLEMENTARY FIG. S1.** A high dose of HTNV A9 N protein inhibited Poly IC or VSV-induced chemokine mRNA production. **(A)** HTNV A9 N proteins (encoded by A9 S plasmid) at a high dose inhibited VSV-induced mRNA production of chemokines MCP-2 (CCL8), RATENS (CCL5), and CXCL10. **(B)** HTNV A9 N proteins at high doses inhibited Poly IC-induced mRNA production of chemokines MCP-2 (CCL8), RATENS (CCL5), and CXCL10. Results are expressed as mean  $\pm$  SEM. \* $p < 0.05$  ( $t$ -test). Representative results from at least three independent experiments. HTNV A9, Hantaan virus A9 strain; VSV, vesicular stomatitis virus.
